# Supplementary material
Source: bioRxiv or medRxiv preprint supplement (https://medrxiv.org/highwire/filestream/89931/field_highwire_adjunct_files/1/2020.07.16.20153437-10.pdf)

**A** IL10 expression in progressive vs stable COVID-19 patients, according to cell type

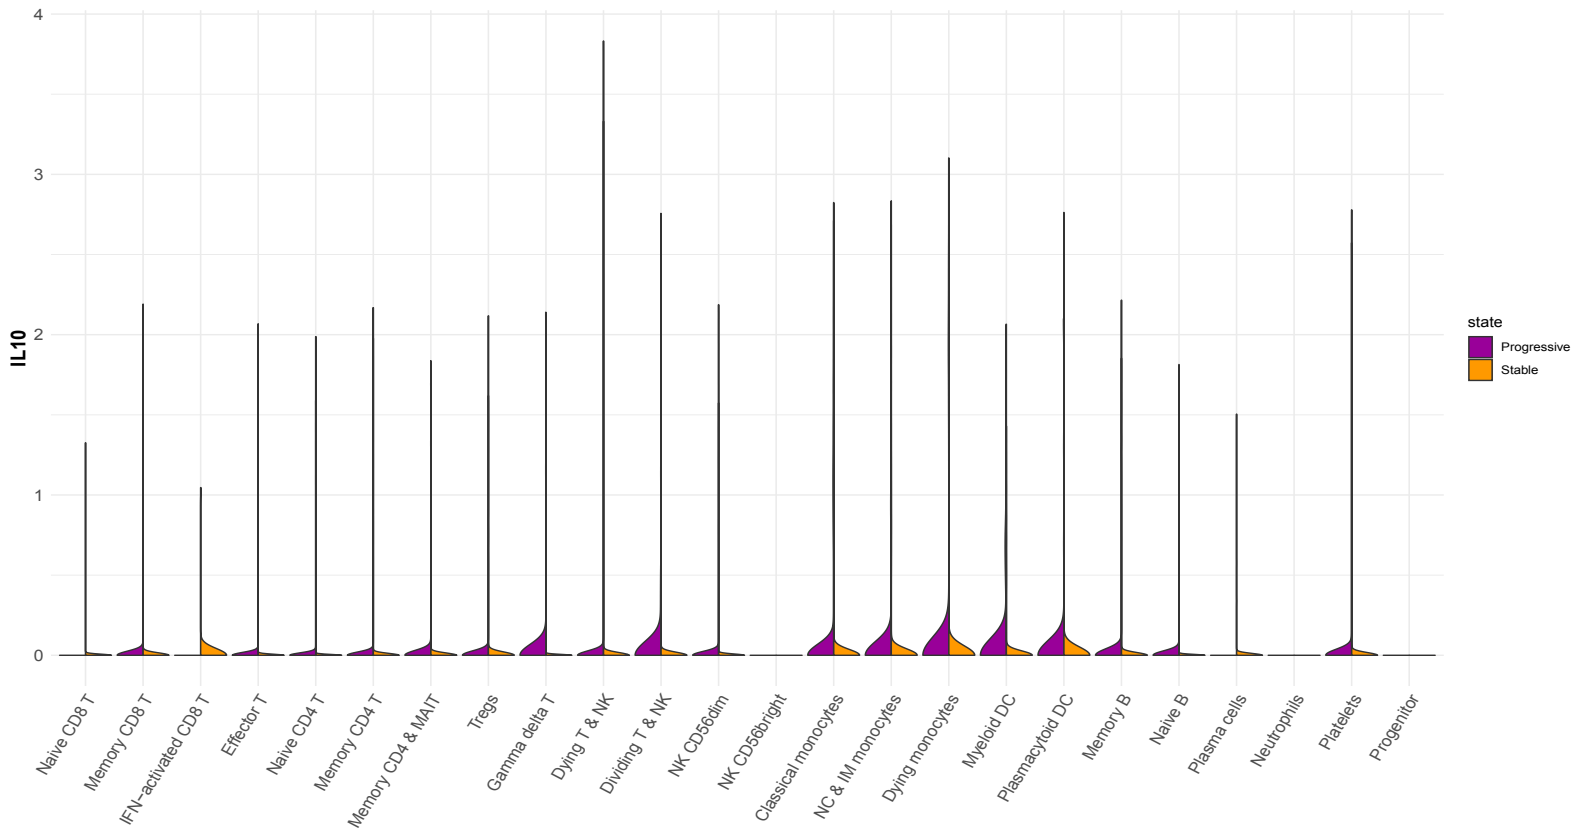

**B** Plasma IL-10 levels in our patients according to disease severity and time

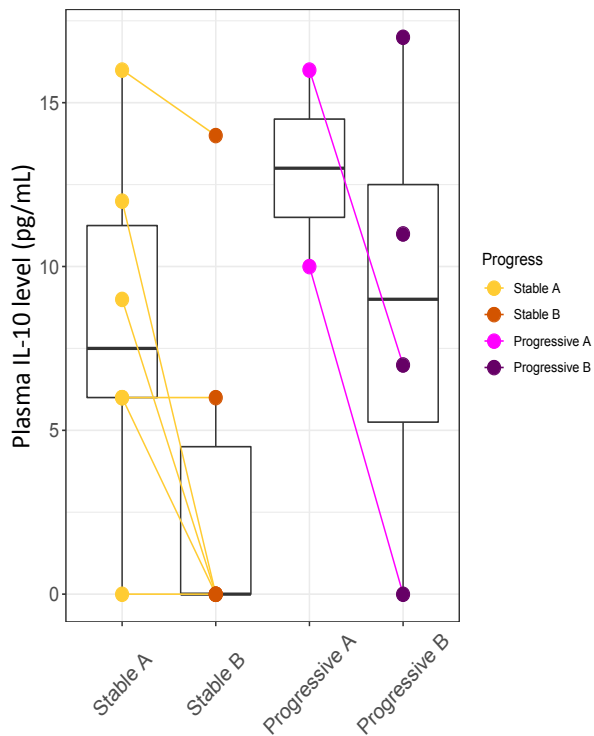

**C** Scatter plot showing correlation between plasma IL-10 level and IFN score for each patient at each time-point (R=0.5)

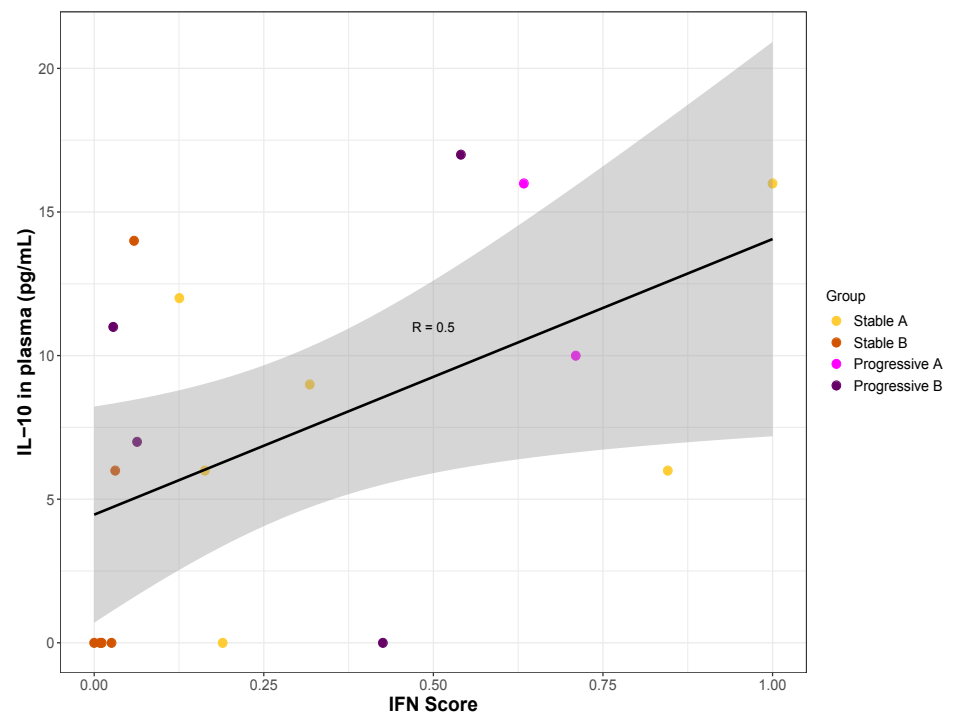

Supplement: Supplementary file [file 2020.07.16.20153437-10.pdf]
